# Supplementary material for: Arginase 1+ microglia reduce Aβ plaque deposition during IL-1β-dependent neuroinflammation
Source: PubMed Central journal article supplement (PMC4634600; doi:10.1186/s12974-015-0411-8), 2015-11-04

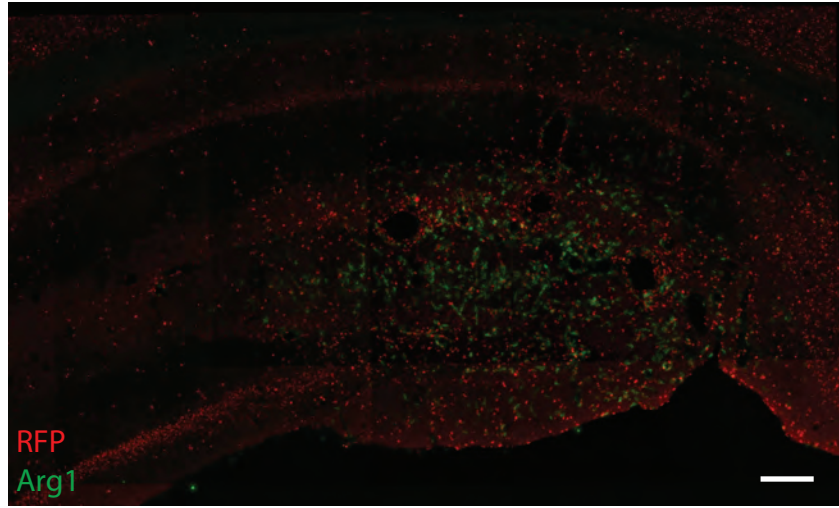

Supplement: 12974_2015_411_MOESM1_ESM.pdf [file 12974_2015_411_MOESM1_ESM.pdf]
